# Supplementary material for: Photocatalytic decomposition of benzene enhanced by the heating effect of light: improving solar energy utilization with photothermocatalytic synergy
Source: Royal Society of Chemistry journal article supplement (doi:10.1039/c7cy00532f), 2017-01-01
Supplement: c7cy00532f1.pdf [file c7cy00532f1.pdf]

## Supporting Information

# Photocatalytic Decomposition of Benzene Enhanced by the Heating Effect of Light: Improving Solar Energy Utilization with Photothermocatalytic Synergy

*Jialin Fang, Zhangsen Chen, Qun Zheng, Danzhen Li\**

State Key Laboratory of Photocatalysis on Energy and Environment, Research

Institute of Photocatalysis, Fuzhou University, Fuzhou 350002, P. R. China

Corresponding author Tel & Fax: (+86)591-83779256, E-mail: dzli@fzu.edu.cn.

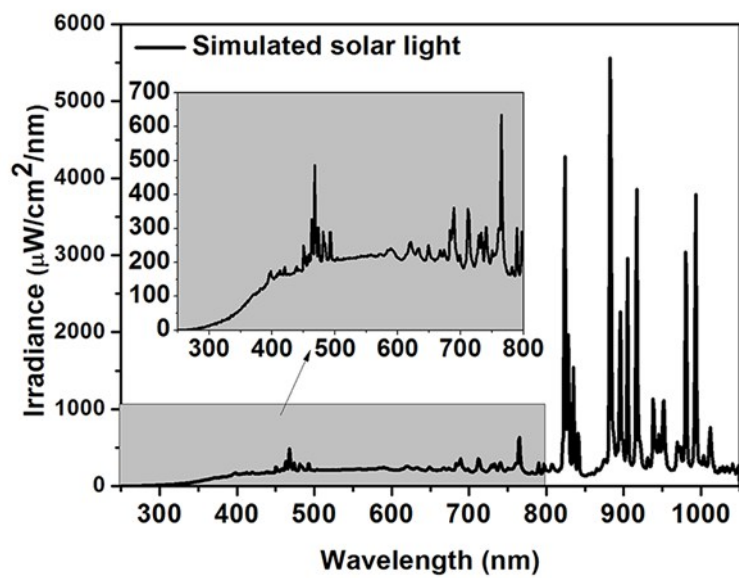

**Figure S1.** The spectra of irradiance for 500 W Xe-arc lamp as simulated solar light source for the experiment of catalytic activity, inserting the magnified graph within

$250 < \lambda < 800$  nm.

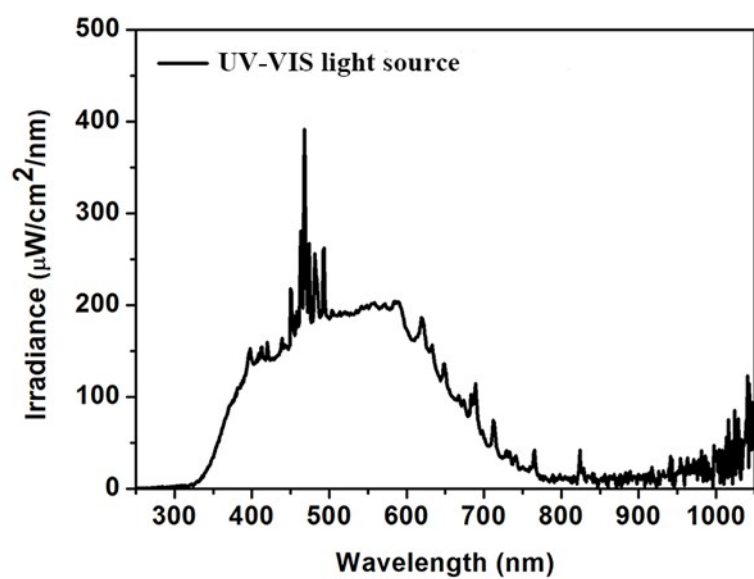

**Figure S2.** The spectra of irradiation of 500 W Xe-arc lamp equipped with a  $300 < \lambda < 800$  nm filter as the UV-VIS light source for the photocatalytic experiment of

ESR.

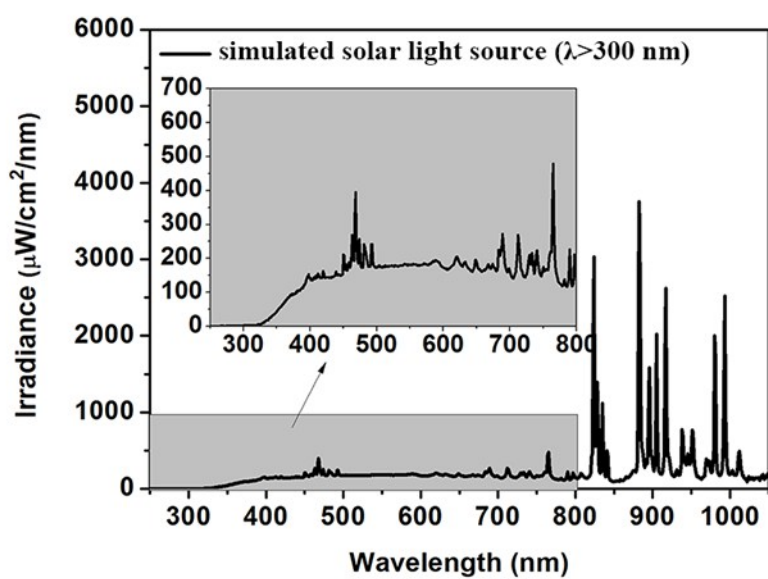

**Figure S3.** The spectra of irradiation of 500 W Xe-arc lamp equipped with a  $\lambda > 300$  nm filter as simulated solar light source for the photothermocatalytic experiment of ESR, inserting the magnified graph within  $250 < \lambda < 800$  nm.

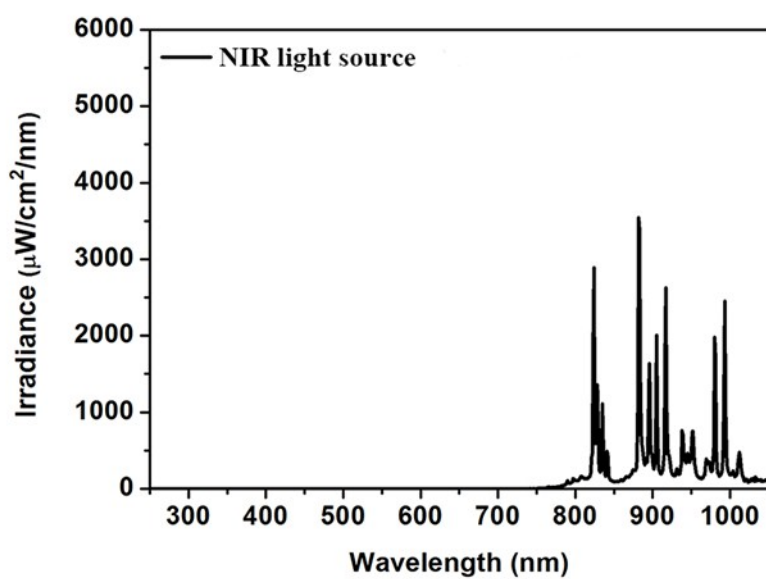

**Figure S4.** The spectra of irradiation of 500 W Xe-arc lamp equipped with a  $\lambda > 800$  nm filter as the NIR light source for the thermocatalytic experiment of ESR.

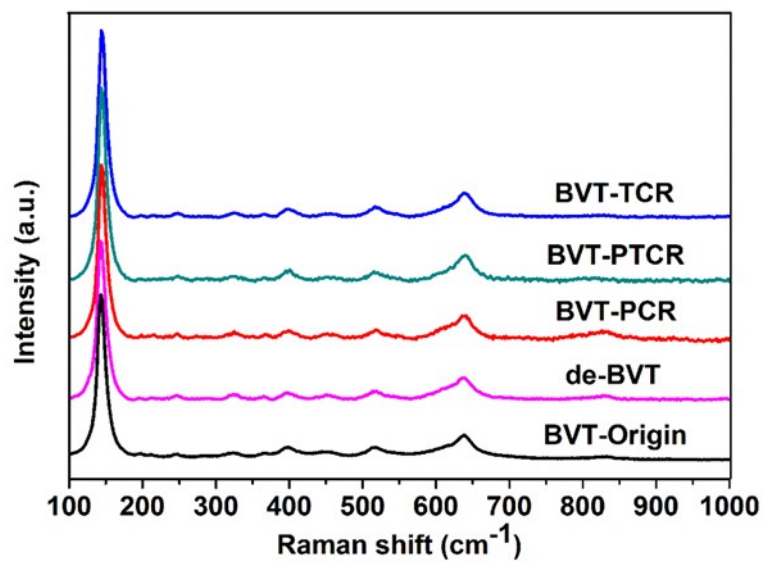

**Figure S5** Raman spectra of BVT-Origin, de-BVT, BVT-PCR, BVT-TCR and BVT-PTCR samples

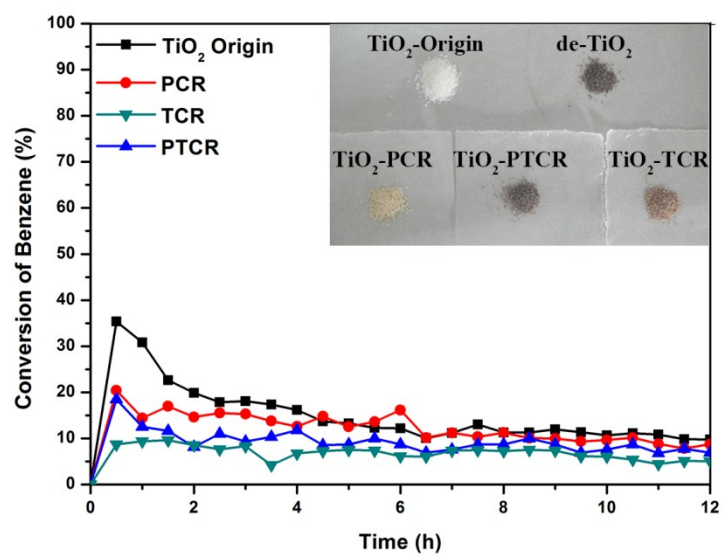

**Figure S6** The photocatalytic conversion of benzene versus time over TiO<sub>2</sub>-Origine, de- TiO<sub>2</sub>, TiO<sub>2</sub>-PCR, TiO<sub>2</sub>-TCR and TiO<sub>2</sub>-PTCR at 30 °C, inserting their color after reaction.

### The calculation of apparent rate constant of reaction ( $k_{app}$ )

The catalyst bed we used can be depicted as follows:

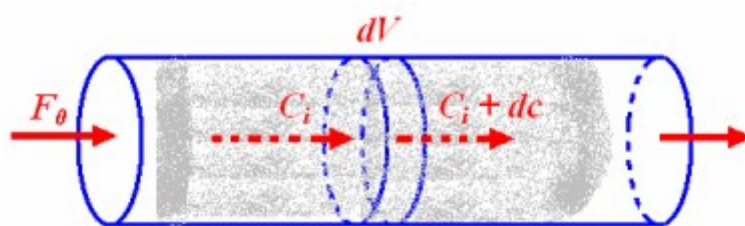

When the steady state is obtained, the mass balance can be depicted as:

$$F_0[C_i - (C_i + dC_i)] = r_i dV \quad (1)$$

$F_0$ : flow rate.  $C_i$ : concentration of composition  $i$ .  $r_i$ : the reaction rate of composition  $i$ .

The concentration can be connected with conversion as:

$$x_i = (C_{i,0} - C_i) / C_{i,0} \quad (2)$$

$x_i$ : conversion of composition  $i$ .

According to (1) and (2), the reaction rate  $r_i$  can be depicted as:

$$r_i = C_{i,0} dx_i / d(V/F_0) \quad (3)$$

Order  $F = F_0 C_{i,0}$  and  $t = V/F$  which refers to contact time, then (3) can be depicted as:

$$r_i = dx_i / dt \quad (4)$$

The reaction of oxidation of benzene corresponds to first-order kinetics, so

$$r_i = kC_i \quad (5)$$

$k$ : reaction rate constant.

Combining (4) and (5) and considering the weight of catalyst, the apparent rate constant  $k_{app}$  can be depicted as:

$$k_{app} = \frac{v}{w} \ln \frac{1}{1-x}$$

$v$  is the flow rate of benzene ( $20 \text{ mL} \cdot \text{min}^{-1}$ );  $w$  is the weight of catalyst;  $x$  is the



conversion of benzene.

The Arrhenius equation here:

$$\ln k = -\frac{E_a}{RT} + \ln A = -B\frac{1}{T} + \ln A$$

$k$  herein is calculated according to the  $k_{app}$  above;  $E_a$  is the Arrhenius activation energy; R is the gas constant; T is the reaction temperature; A is the pre-exponential factor.

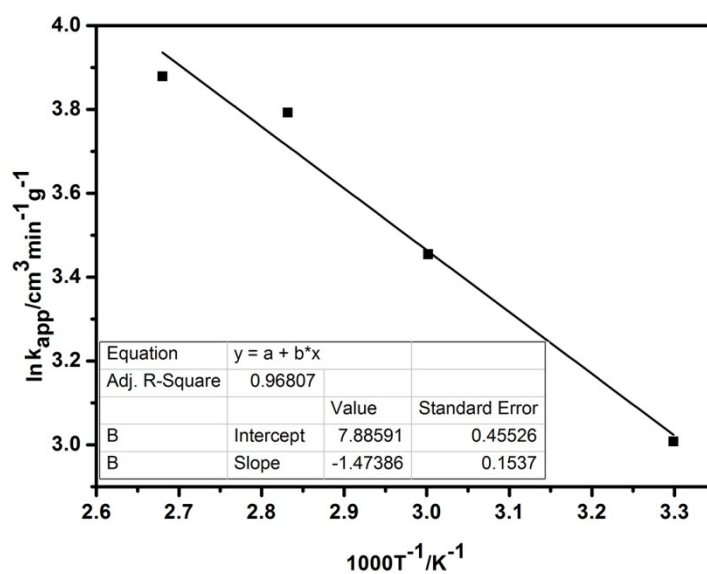

**Figure S7** The  $\ln k_{app}$  versus  $1000T^{-1}$  Arrhenius plot for BVT.

\*The higher the value of Adj. R-Square, the better linearity.

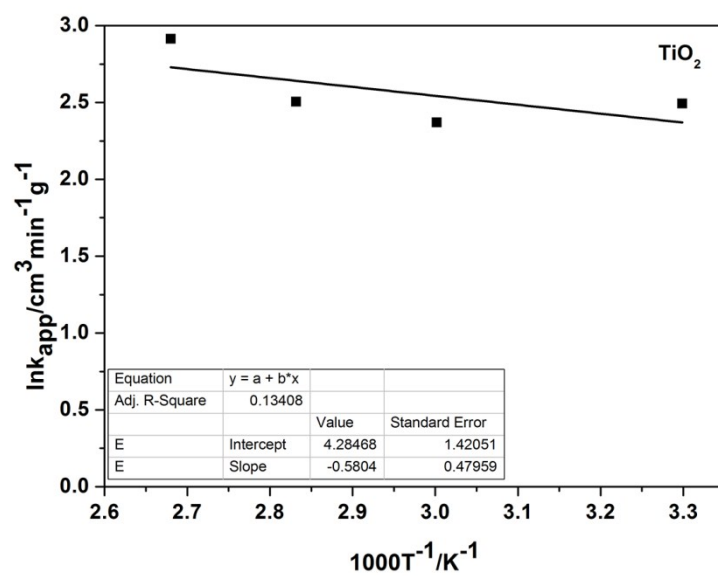

**Figure S8** The  $\ln k_{\text{app}}$  versus  $1000T^{-1}$  Arrhenius plot for  $\text{TiO}_2$ .

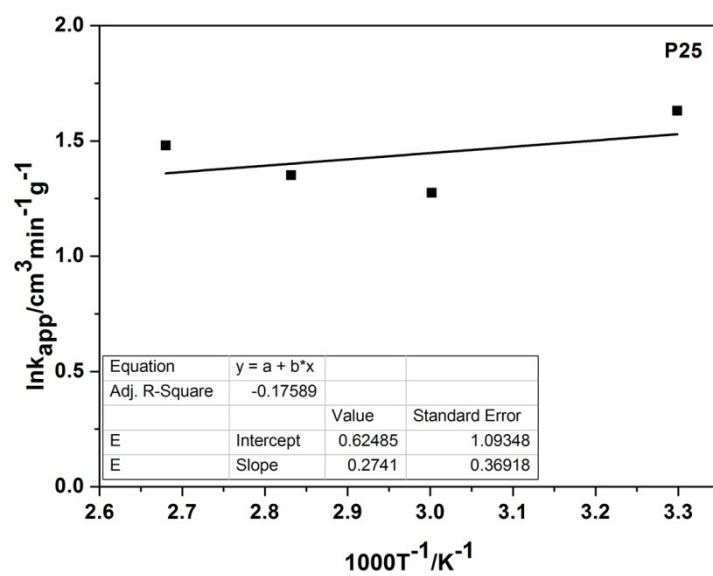

**Figure S9** The  $\ln k_{app}$  versus  $1000T^{-1}$  Arrhenius plot for P25.

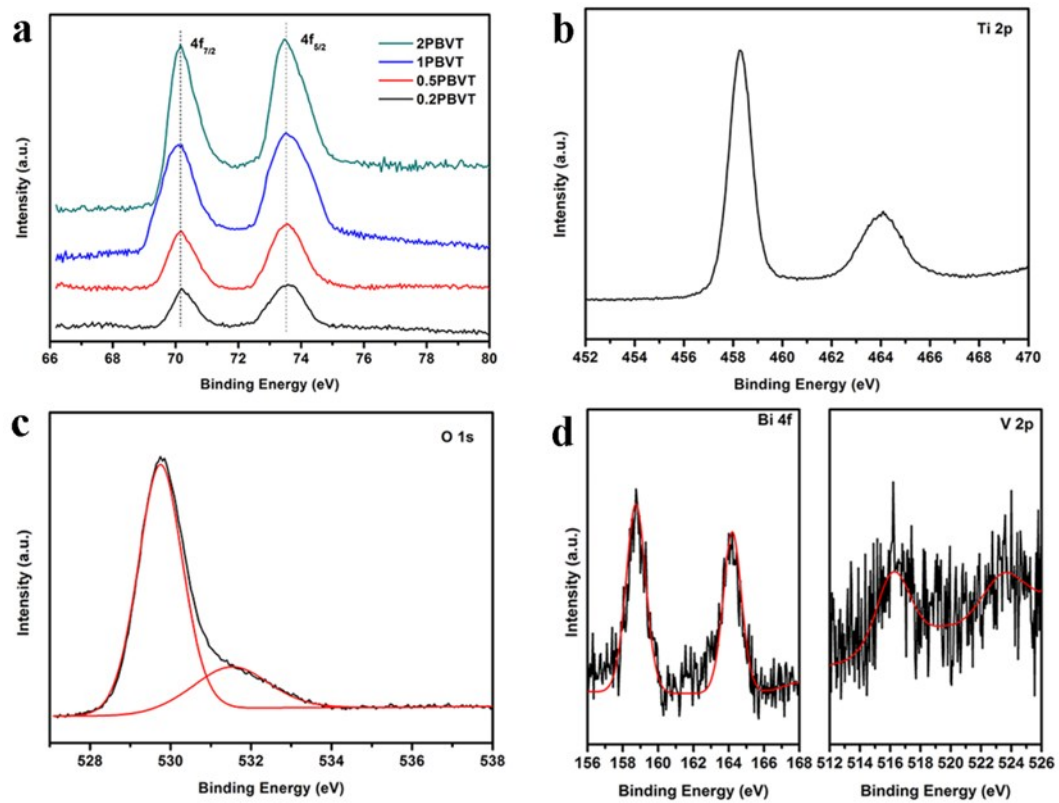

**Figure S10** XPS spectra for Pt 4f for 0.2PBVT, 0.5PBVT, 1PBVT and 2PBVT; XPS spectra of Ti 2p (b), O 1s (c), Bi 4f (d) and V 2p (d) for 1PBVT

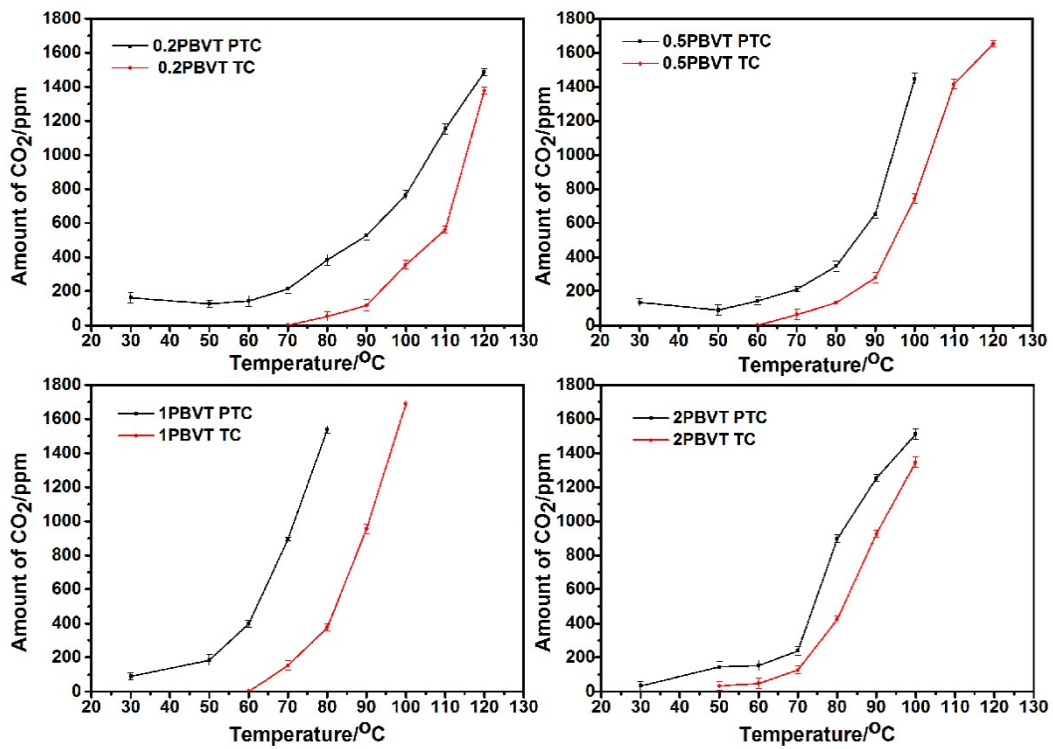

**Figure S11** The amount of CO<sub>2</sub> under PTC and TC condition at different temperatures for 0.2PBVT, 0.5PBVT, 1PBVT and 2PBVT.

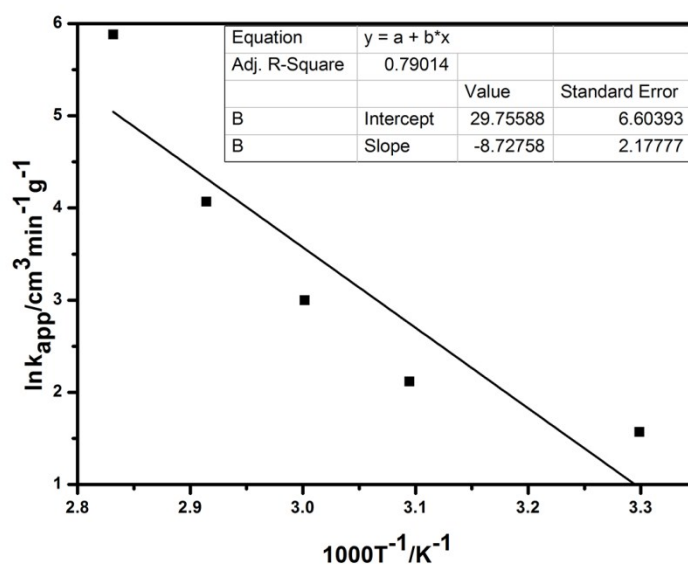

**Figure S12** The  $\ln k_{app}$  versus  $1000T^{-1}$  Arrhenius plot for PBVT.

\*The higher the value of Adj. R-Square, the better linearity.

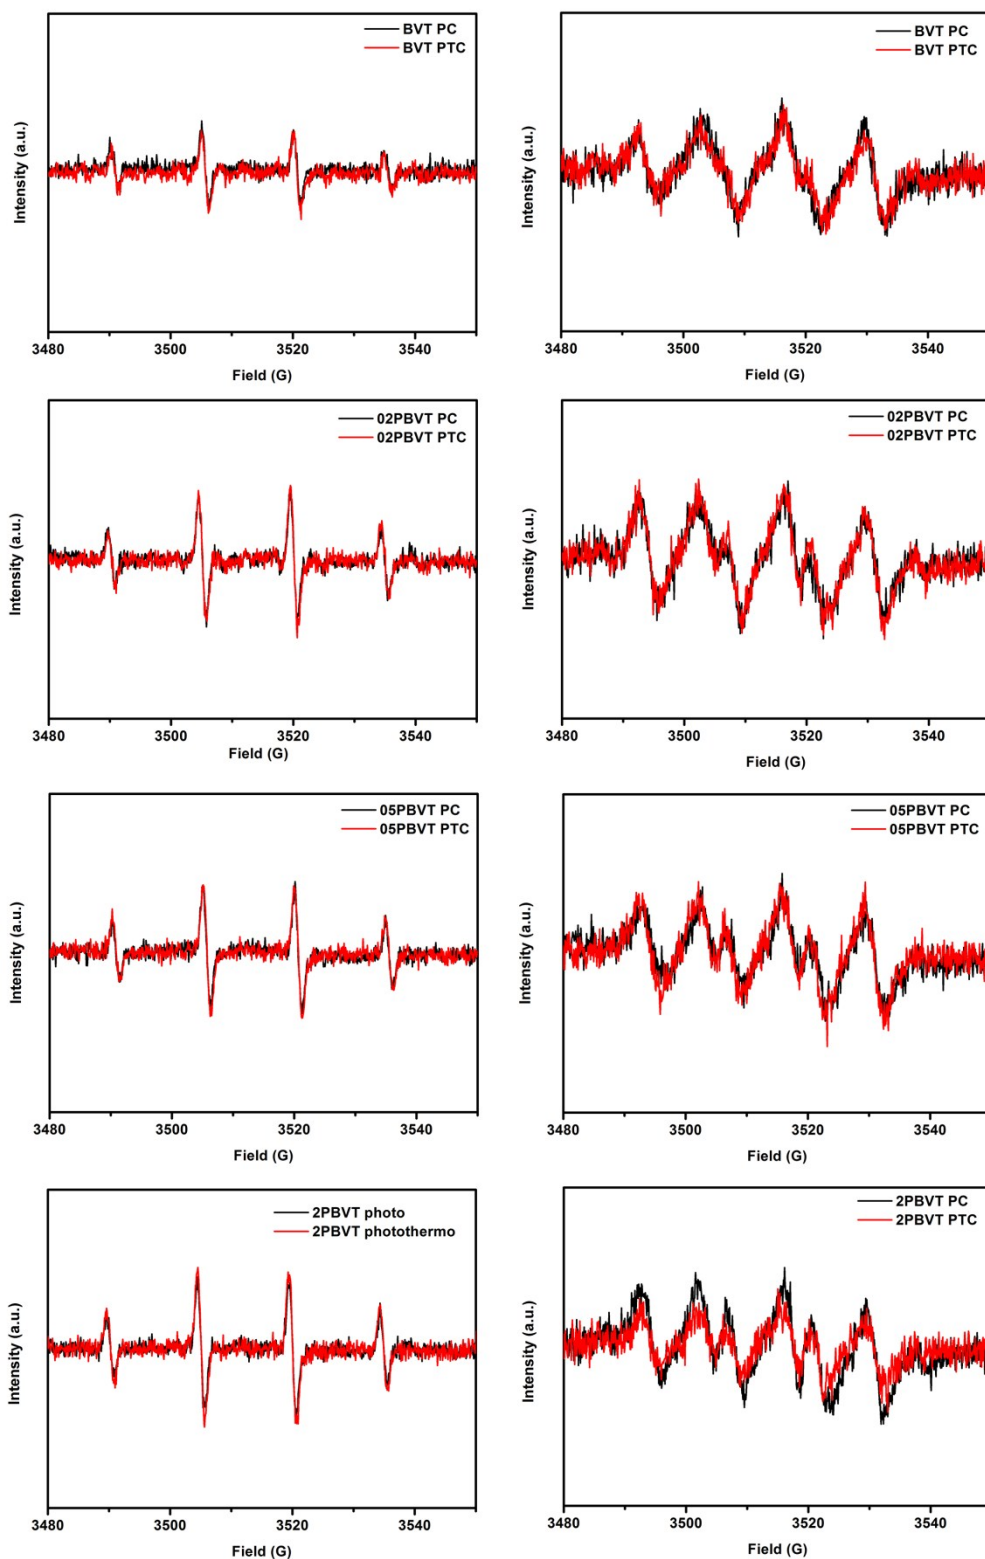

**Figure S13** ESR signals of DMPO- $\cdot$ OH and  $O_2^{\cdot-}$  of BVT, 02PBVT, 05PBVT and 2PBVT under under PC (photocatalytic, see the irradiation graph in Figure S2) and PTC (photothermocatalytic, see the irradiation graph in Figure S3) condition.

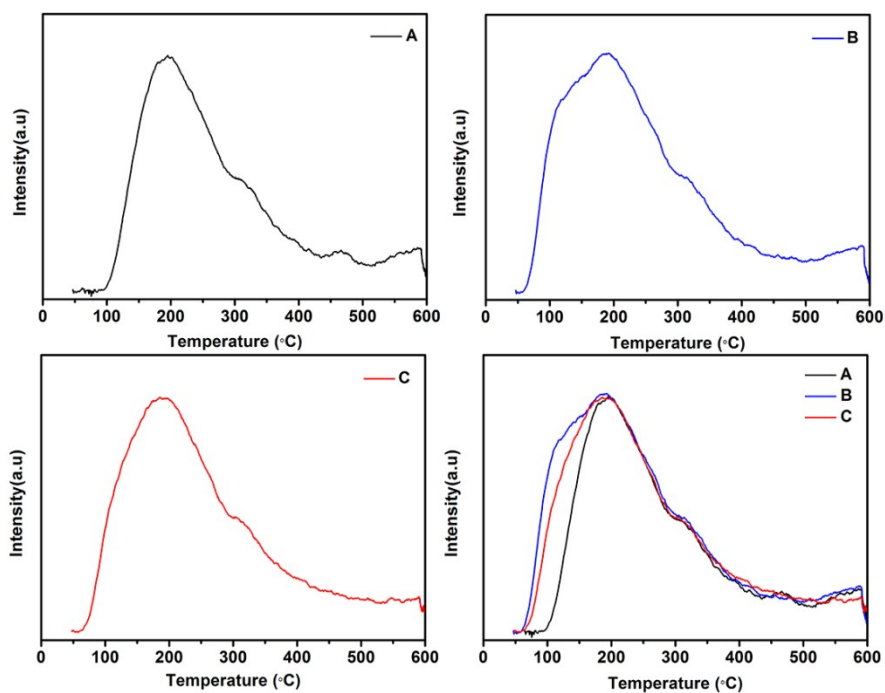

**Figure S14** O<sub>2</sub>-TPD profile of BVT with the process of oxygen adsorption under (A) 80 °C, (B) UV-vis irradiation (irradiation spectra in Figure S2) at ambient temperature, (C) simulated solar irradiation (irradiation spectra in Figure S3) at 80 °C and the merge image of (A), (B) and (C).
